# Supplementary material for: Cognitive profiles discriminate between genetic variants of behavioral frontotemporal dementia
Source: PubMed Central journal article supplement (PMC7293665; doi:10.1007/s00415-020-09738-y), 2020-02-12
Supplement: 415_2020_9738_MOESM1_ESM.pdf [file 415_2020_9738_MOESM1_ESM.pdf]

## **Supplementary material**

**Article title:** Cognitive profiles discriminate between genetic variants of behavioral frontotemporal dementia

**Journal name:** Journal of Neurology

### **Author names and affiliation:**

Poos, J.M. MSc<sup>12</sup>, Jiskoot, L.C. PhD<sup>13</sup>, Leijdesdorff, S.M.J. MSc.<sup>4</sup>, Seelaar, H. MD PhD<sup>1</sup>, Panman, J.L. MSc. <sup>12</sup>, van der Ende, E.L MD<sup>1</sup>, Mol, M.O. MD<sup>1</sup>, Meeter, L.H.H. MD PhD<sup>1</sup>, Pijnenburg, Y.A.L. MD PhD<sup>5</sup>, Donker Kaat, L. MD PhD<sup>16</sup>, de Jong, F.J. MD PhD<sup>1</sup>, van Swieten, J.C. MD PhD<sup>1</sup>, Papma, J.M. PhD<sup>1</sup>, van den Berg, E. PhD<sup>1</sup>

<sup>1</sup>Alzheimer Center and Department of Neurology, Erasmus MC University Medical Center, Rotterdam, the Netherlands

<sup>2</sup>Department of Radiology, Leiden University Medical Center, Leiden, the Netherlands

<sup>3</sup>Dementia Research Center, University College London, London, UK

<sup>4</sup>Department of Psychiatry and Psychology, Maastricht University, Maastricht, the Netherlands

<sup>5</sup>Alzheimer center, Department of Neurology, Amsterdam University Medical Center, location VU University Medical Center, Amsterdam Neuroscience, Amsterdam, the Netherlands

<sup>6</sup> Department of Clinical Genetics, Erasmus MC University Medical Center, Rotterdam, The Netherlands

**E-mail address corresponding author:** [j.m.poos@erasmusms.nl](mailto:j.m.poos@erasmusms.nl)

**Table 1.** Differences between *GRN* patients with predominant right-sided, left-sided or generalized atrophy on seven cognitive domains.

| <b>Domain</b>                                | <b>Left</b> | <i>n</i> | <b>Right</b> | <i>n</i> | <b>Generalized</b> | <i>n</i> | <i>p</i> Value |
|----------------------------------------------|-------------|----------|--------------|----------|--------------------|----------|----------------|
| <b>Language</b>                              | -3.3 ± 1.2  | 10       | -1.0 ± 0.7   | 4        | -2.1 ± 0.9         | 4        | 0.02           |
| <b>Attention and mental processing speed</b> | -6.6 ± 4.2  | 9        | -0.7 ± 0.7   | 4        | -3.6 ± 3.8         | 3        | 0.2            |
| <b>Executive functioning</b>                 | -6.2 ± 2.0  | 9        | -2.2 ± 1.5   | 4        | -5.1 ± 2.2         | 4        | 0.09           |
| <b>Memory - learning</b>                     | -5.6 ± 6.5  | 9        | -3.5 ± 5.2   | 4        | -7.0 ± 9.3         | 3        | 0.8            |
| <b>Memory - recall</b>                       | -1.1 ± 1.6  | 7        | -0.3 ± 2.2   | 4        | -1.0 ± 1.7         | 3        | 0.8            |
| <b>Working memory</b>                        | -2.1 ± 1.0  | 4        | -0.1 ± 2.7   | 4        | -                  | 0        | 0.5            |
| <b>Visuoconstruction</b>                     | -1.2 ± 1.7  | 9        | -0.3 ± 0.8   | 4        | -0.9 ± 2.0         | 3        | 0.4            |

Values indicate mean ± SD. The *p* values constitute interaction terms of univariate analyses of covariance (corrected for age and education).

**Fig. 1** Within-individual trajectories on neuropsychological tests

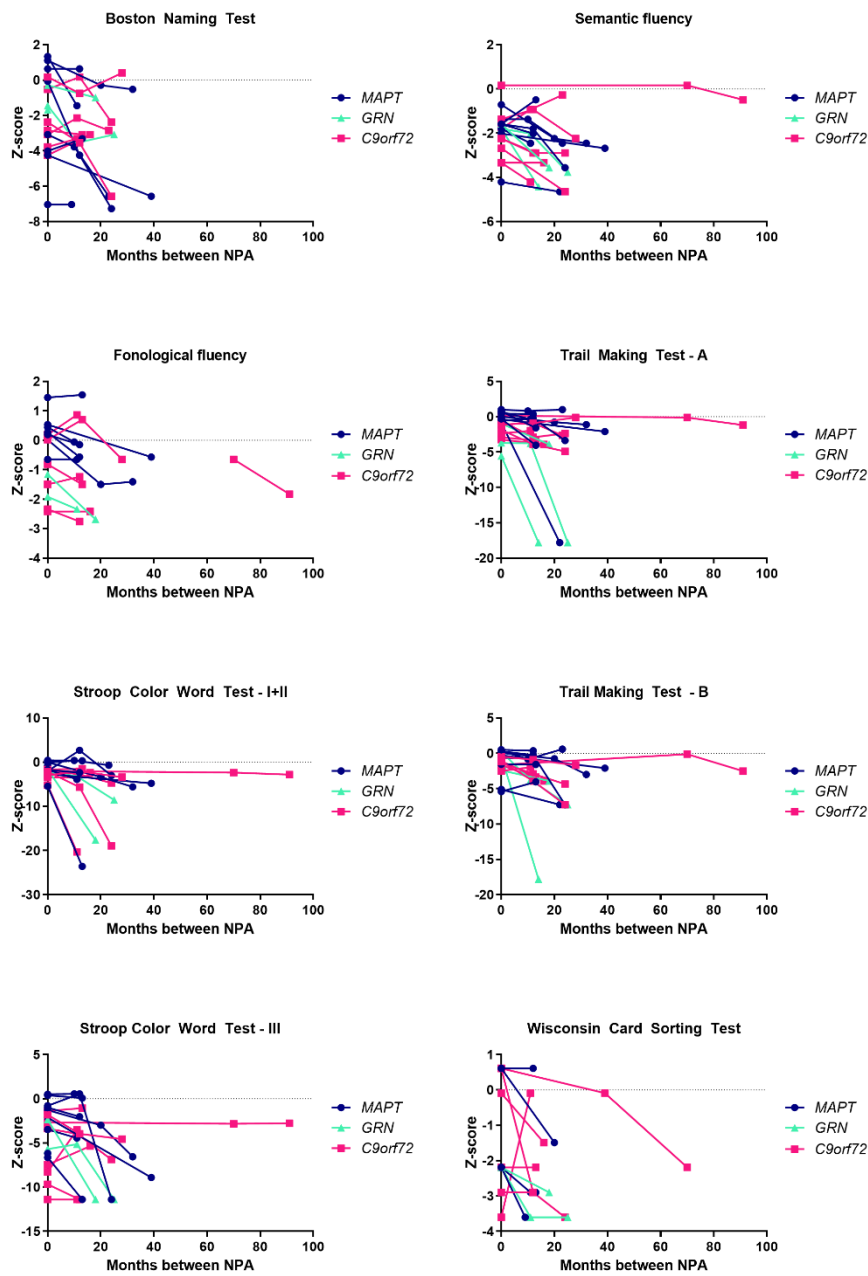

Abbreviations: NPA = neuropsychological assessment; *MAPT* = microtubule-associated protein tau; *GRN* = progranulin; *C9orf72* = chromosome 9 open reading frame 72. Raw data for each neuropsychological test were first converted to z-scores by standardization to the baseline data of healthy controls. Composite cognitive domain scores were calculated. Each subplot presents the trajectory on a specific cognitive domain. Data are available in: Boston Naming Test (*MAPT* n=8; *GRN* n=2; *C9orf72* n=7); semantic fluency (*MAPT* n=8; *GRN* n=3; *C9orf72* n=8); letter fluency (*MAPT* n=7; *GRN* n=2; *C9orf72* n=6); Trail Making Test - A (*MAPT* n=9; *GRN* n=3; *C9orf72* n=8); Stroop Color Word Test I+II (*MAPT* n=8; *GRN* n=2; *C9orf72* n=8); Trail Making Test - B (*MAPT* n=8; *GRN* n=3; *C9orf72* n=9); Stroop Color Word Test III (*MAPT* n=8; *GRN* n=2; *C9orf72* n=8); Wisconsin Card Sorting Test (*MAPT* n=4; *GRN* n=2; *C9orf72* n=6).

**Fig. 2** Within-individual trajectories on neuropsychological tests.

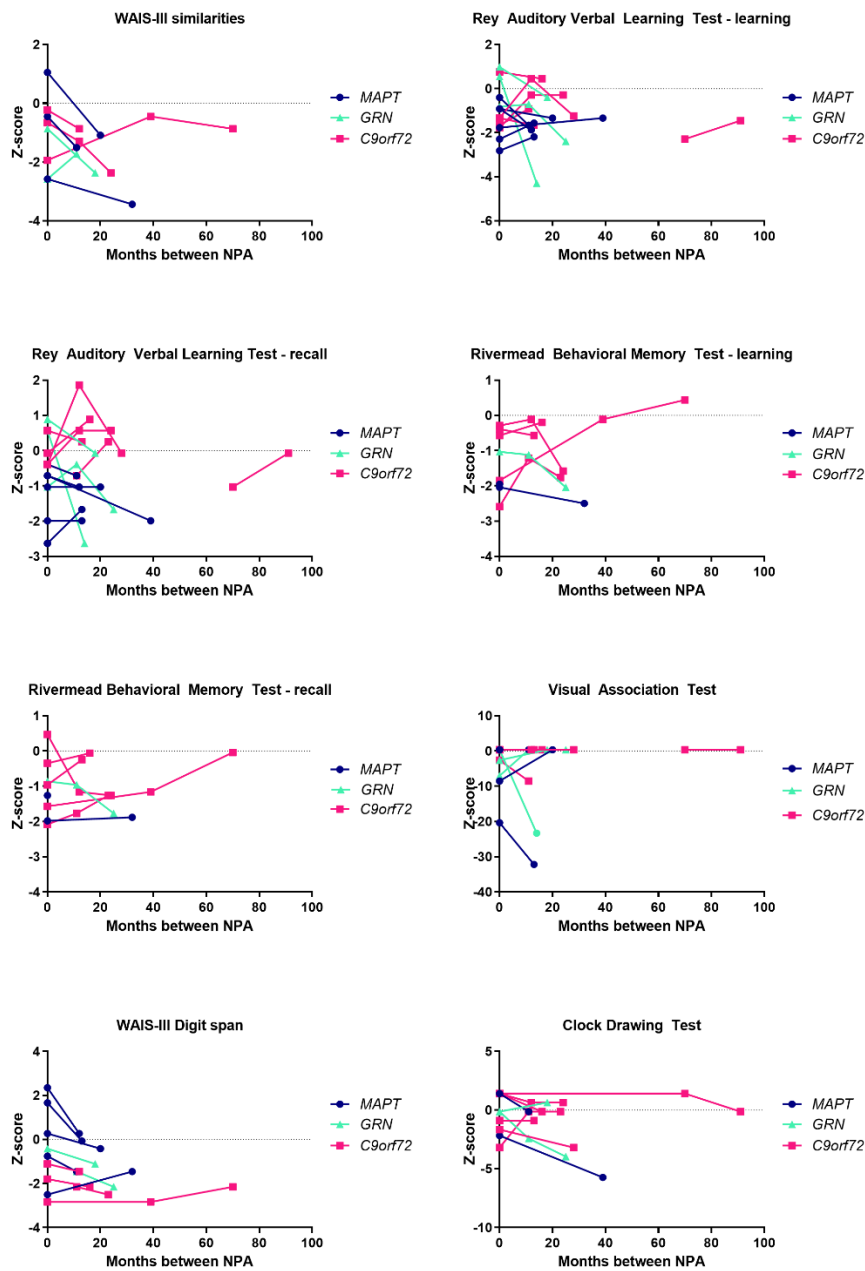

Abbreviations: NPA = neuropsychological assessment; *MAPT* = microtubule-associated protein tau; *GRN* = progranulin; *C9orf72* = chromosome 9 open reading frame 72. Raw data for each neuropsychological test were first converted to z-scores by standardization to the baseline data of healthy controls. Composite cognitive domain scores were calculated. Each subplot presents the trajectory on a specific cognitive domain. Data are available in: WAIS-III Similarities (*MAPT* n= 3; *GRN* n=2; *C9orf72* n= 3); Rey Auditory Verbal Learning Test – learning (*MAPT* n= 6; *GRN* n=3; *C9orf72* n=6); Rey Auditory Verbal Learning – recall (*MAPT* n=6; *GRN* n=3; *C9orf72* n=6); Rivermead Behavioral Memory Test - learning (*MAPT* n=1; *GRN* n=1; *C9orf72* n=6); Rivermead Behavioral Memory Test - recall (*MAPT* n=5; *GRN* n=1; *C9orf72* n= 6); Visual Association Test (*MAPT* n= 3; *GRN* n=3; *C9orf72* n=3); WAIS-III Digit Span (*MAPT* n= 5; *GRN* n=2; *C9orf72* n=4); Clock Drawing Test (*MAPT* n=2; *GRN* n=2; *C9orf72* n=6).
